# Supplementary material for: FOXG1 Expression Is Elevated in Glioma and Inhibits Glioma Cell Apoptosis
Source: PubMed Central journal article supplement — J Cancer. 2018 Feb 11;9(5):778–83. doi: 10.7150/jca.22282 (PMC5868141; doi:10.7150/jca.22282), 2018-02-11
Supplement: jcav09p0778s1.pdf [file jcav09p0778s1.pdf]

**Table S1.** The clinical pathologic information of the clinical glioma samples.

| NO | Age (year) | Sex | Latency | Size(cm)       | Grade  | Ki-67 (%) | Length of being in hospital) | Mean IOD of FOXG1 |
|----|------------|-----|---------|----------------|--------|-----------|------------------------------|-------------------|
| 1  | 53         | M   | 5y      | 4.5×3.5×1      | II     | 4         | *                            | *                 |
| 2  | 57         | M   | 20d     | 3×2.5×1.2      | IV     | 40        | *                            | *                 |
| 3  | 49         | M   | 1m      | 4×2×1.5        | IV     | 20        | *                            | *                 |
| 4  | 44         | F   | 20d     | 3.7×2.5×1      | IV     | 20        | *                            | *                 |
| 5  | 28         | M   | 4m      | 2×1.5×0.7      | II     | <3        | *                            | *                 |
| 6  | 53         | F   | *       | 2×2.5×1.5      | III-IV | 40        | *                            | *                 |
| 7  | 26         | M   | *       | 7.5×5.5×4      | II     | <5        | *                            | *                 |
| 8  | 31         | F   | 15d     | 4×3×1.3        | II     | 5         | *                            | *                 |
| 9  | 68         | M   | 2m      | 3.5×2.4×1.6    | IV     | 10        | *                            | *                 |
| 10 | 31         | M   | 9m      | 2.9×4.3×3.1    | III-IV | 5         | *                            | *                 |
| 11 | 56         | F   | 15d     | 4×2.5×1.7      | IV     | 40        | *                            | *                 |
| 12 | 42         | M   | 7d      | 5×3×1.5        | IV     | 10        | *                            | *                 |
| 13 | 63         | M   | *       | 5.5×3×1.3      | IV     | 60        | *                            | *                 |
| 14 | 57         | M   | *       | 5.5×3.8×1.7    | IV     | 30        | *                            | *                 |
| 15 | 47         | F   | *       | 5×2.5×0.6      | II     | 5         | *                            | *                 |
| 16 | 4          | F   | 2.5y    | 6.9×5.0×4.8    | I      | *         | 18                           | 4064.016          |
| 17 | 18         | F   | 6m      | 3.2×2.8        | I      | 1         | 15                           | 628.6616          |
| 18 | 52         | F   | *       | 4.5×2.5×1.5    | I      | <1%       | *                            | 2001.147          |
| 19 | 57         | M   | 6m      | 4.4×3.7×3.2    | II     | 5         | 15                           | 2924.186          |
| 20 | 39         | M   | 1m      | 5.58×5.15×2.75 | II     | *         | 14                           | 3514.833          |
| 21 | 36         | M   | 1m      | 3×3            | II     | 1         | 71                           | 44360.61          |
| 22 | 29         | M   | 6       | 6×5×4          | II     | 1         | 18                           | 12843.78          |
| 23 | 46         | M   | 2y      | 4×5×3          | II     | *         | 14                           | 360.1528          |
| 24 | 48         | F   | 3y      | 5×4.6          | II     | 5.00      | 30                           | 448.3513          |
| 25 | 40         | M   | 5y      | 6×3.3×5        | II     | 1.00      | 33                           | 830.7893          |
| 26 | 4          | M   | 1       | 6.9×4.5×5.4    | II     | *         | 38                           | 1431.219          |
| 27 | 21         | M   | 4m      | 7.7×7×6.2      | II     | 10        | 14                           | 551.204           |
| 28 | 56         | M   | 2y      | 4×3×4          | II     | 2         | 20                           | 1482.117          |
| 29 | 15         | F   | 1y      | 5.6×4.4        | II     | *         | 14                           | 3441.622          |
| 30 | 54         | F   | 2y      | 4.5×4.8        | II     | 10        | 17                           | 1847.98           |
| 31 | 38         | M   | 2m      | 4.9×3.3×3.4    | II     | 1         | 13                           | 2180.694          |
| 32 | 55         | M   | 2m      | 4.2×6.7        | III    | 5         | 72                           | 3919.931          |
| 33 | 18         | F   | 5d      | 4.5×3.7        | III    | *         | 11                           | 830.7893          |
| 34 | 44         | M   | 2y      | 8.1×7.6        | III    | *         | 14                           | 17492.19          |
| 35 | 54         | F   | 20d     | 3.5×4×3.0      | III    | 5         | 32                           | 16300.55          |
| 36 | 55         | M   | 20d     | 4.7×2.5×4.0    | III    | 1         | 51                           | 16194.3           |
| 37 | 55         | M   | 9m      | 3×3.5          | III    | *         | 13                           | 18248.49          |
| 38 | 54         | F   | 20d     | 3.5×4×3        | III    | 5         | 32                           | 7445.196          |

|    |    |   |      |             |        |    |    |          |
|----|----|---|------|-------------|--------|----|----|----------|
| 39 | 57 | F | 10y  | 5×4.5×4.5   | III    | 20 | 16 | 3542.219 |
| 40 | 48 | F | 1y   | 2.5×2.7     | III    | 5  | 19 | 21981.99 |
| 41 | 48 | F | 2y   | 3×4×4       | III    | 10 | 16 | 16756.72 |
| 42 | 34 | F | 7y   | 7×9×9.4     | III    | 5  | 16 | 23139.82 |
| 43 | 33 | F | 1m   | 2.8×5.3×4.1 | III    | 2  | 28 | 26273.56 |
| 44 | 43 | M | 4m   | 5×5.5×6     | III-IV | 5  | 12 | 34226.12 |
| 45 | 51 | M | 2y   | 2.8×3.2×3.6 | IV     | 10 | 13 | 35731.56 |
| 46 | 65 | F | 7d   | 9.8×4.5     | IV     | 20 | 20 | 4673.896 |
| 47 | 52 | M | 1w   | 5.5×6×5.5   | IV     | *  | 28 | 33916.75 |
| 48 | 56 | M | 1m   | 6×3.5       | IV     | 20 | 14 | 29771.33 |
| 49 | 45 | F | 1m   | 2.6×3.8     | IV     | 20 | 18 | 26514.55 |
| 50 | 27 | F | 3m   | 4×5×5.5     | IV     | 80 | 18 | 7082.854 |
| 51 | 49 | F | 1m   | 2.7×2.4×2.1 | IV     | 10 | 16 | 7682.753 |
| 52 | 53 | M | 10d  | 3.2×2.2×2.6 | IV     | 10 | 18 | 11681.25 |
| 53 | 63 | M | 10m  | 3.3×6.6×5.4 | IV     | 5  | 21 | 9678.266 |
| 54 | 55 | M | 10d  | 3.5×4.      | IV     | 20 | 14 | 29618.98 |
| 55 | 4  | F | 2.5y | 6.9×5×4.8   | IV     | *  | 18 | 4064.016 |
| 56 | 45 | M | 30d  | 3.2×4       | IV     | 30 | 15 | 9131.292 |
| 57 | 39 | M | 1.5y | 5.5×4.8×4.1 | IV     | 6  | 19 | 29087.64 |
| 58 | 38 | M | 6m   | 7.5×4.8×5.7 | IV     | 10 | 18 | 32447.81 |

M, Male; F, Female; \*, no available data; d, day; m, month; y, year. No.1-15 is the fresh glioma samples

from clinic. No.1-15 were fresh collected samples that were used for western blotting, real-time PCR and

IHC. No.16-58 were formalin-fixed and paraffin-embedded glioma specimens. They were only used for

IHC.

**Table S2.** The classified statistic of 43 glioma patients according to clinical pathological features.

| Factor    | Variable   | N (%)      | Mean IOD of FOXG1<br>(Mean ± SEM) | p value*            |
|-----------|------------|------------|-----------------------------------|---------------------|
| Histology | low grade  | 16 (37.2%) | 5181.96±2716.14                   | 0.0008 <sup>a</sup> |
|           | high grade | 27 (62.8%) | 17682.77±2142.87                  |                     |
| Ki-67     | <10%       | 19 (44.1%) | 13470.93±3022.65                  | 0.427 <sup>b</sup>  |
|           | ≥10%       | 14 (32.6%) | 15502.45±3380.29                  |                     |
|           | no data    | 10 (23.3%) | 8736.40±3474.00                   |                     |
| Grade     | I          | 3 (7%)     | 2231.27±998.35                    | 0.005 <sup>b</sup>  |

|                                   |         |            |                        |                    |
|-----------------------------------|---------|------------|------------------------|--------------------|
|                                   | II      | 13 (30.2%) | 5862.88 ±3332.49       |                    |
|                                   | III     | 12(27.9%)  | 14343.81 ±2418.03      |                    |
|                                   | IV      | 15(34.9%)  | 20353.93 ±3244.71      |                    |
| Gender                            | Female  | 19 (44.2%) | 25397.0711 ±3513.94286 | 0.078 <sup>a</sup> |
|                                   | Male    | 24 (55.8%) | 20000.1071 ±1958.32778 |                    |
| Age                               | <45     | 19 (44.2%) | 13078.53 ±3245.01      | 0.983 <sup>a</sup> |
|                                   | ≥ 45    | 24 (55.8%) | 12993.9 ±2316.72       |                    |
| Length of<br>being in<br>hospital | ≤ 20d   | 31 (72.1%) | 12824.04 ±2140.26      | 0.689 <sup>a</sup> |
|                                   | >20d    | 11 (25.6%) | 14618.13 ±4424.40      |                    |
|                                   | no data | 1(2.3%)    | 2001.147               |                    |

<sup>a</sup>Student's t-test;

<sup>b</sup>One-way ANOVA.

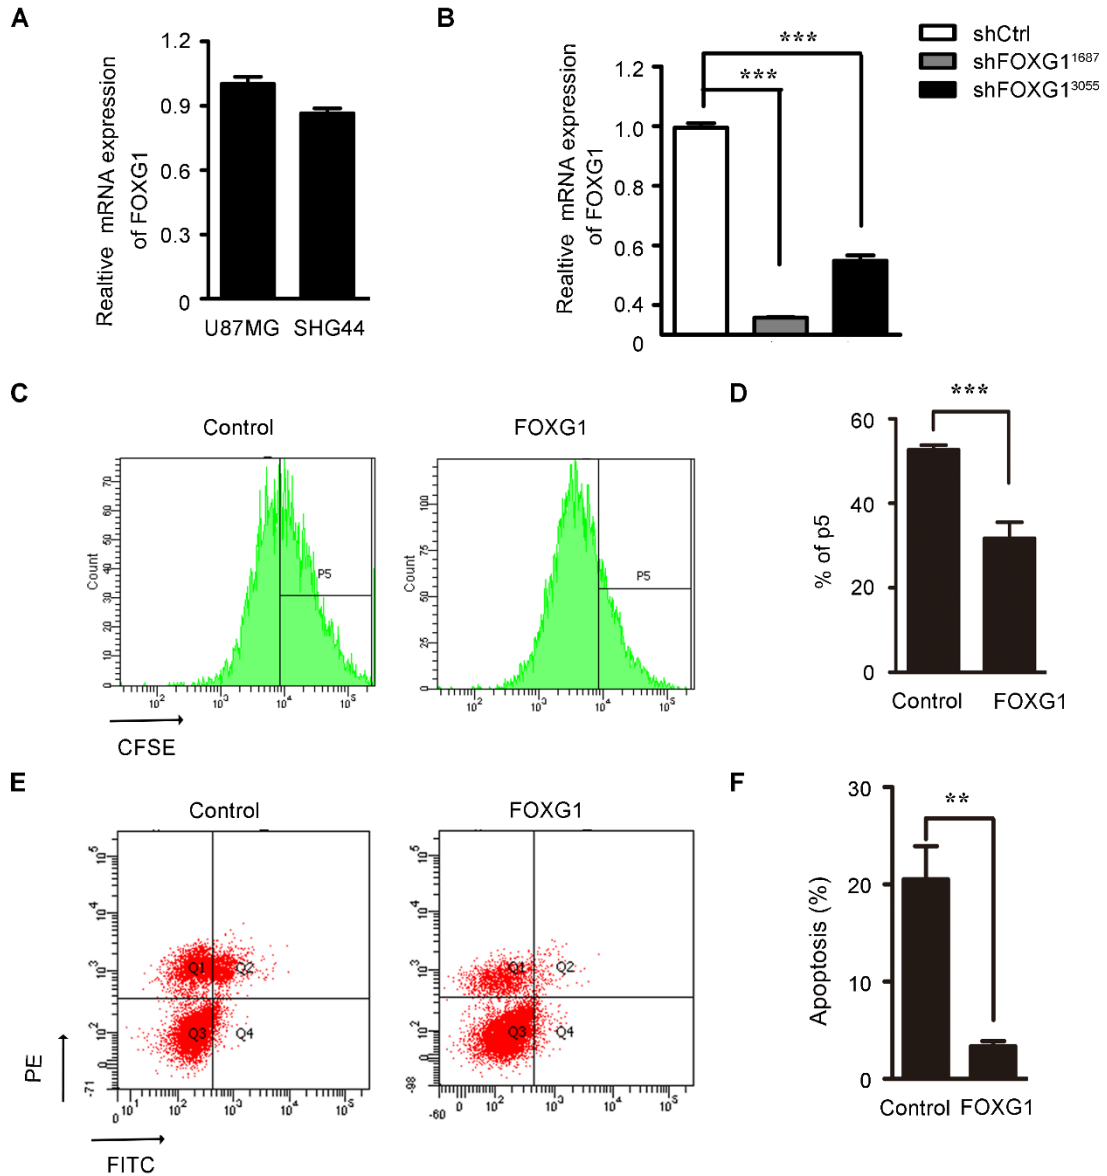

**Figure S1. FOXG1 affected glioma cell proliferation and cell apoptosis.** (A) Real-time PCR analysis of FOXG1 expression in glioma cell lines. The expression of FOXG1 in U87MG was normalized as 1 in real-time PCR. GAPDH was used as an internal control. (B and C) CFSE proliferation assay was used to assess cell proliferation of infected SHG44 cells. (D) Real-time PCR analyses verified the knockdown efficiency of two lentivirus-mediated shRNA systems. The lentivirus-mediated shCtrl was used as control. (E) Cell apoptosis was determined by flow cytometry using FITC-Annexin V/PI staining in SHG44 cells.

The Annexin V<sup>+</sup>/PI<sup>+</sup> and Annexin V<sup>+</sup>/PI<sup>-</sup> were considered to be apoptotic cells. **(F)** The quantitative data of the rate of apoptotic cells as detected by flow cytometry. All data were shown as mean  $\pm$  SEM. For all statistics analyses in this figure, \*\*, P < 0.01; \*\*\*, P < 0.001.
